# Supplementary material for: Epithelial and Mesenchymal Markers in Adrenocortical Tissues: How Mesenchymal Are Adrenocortical Tissues?
Source: MDPI journal article supplement (doi:10.3390/cancers13071736), 2021-04-06
Supplement: s1 [file s1]

## Supplementary information

### Epithelial and mesenchymal markers in adrenocortical tissues: how mesenchymal are adrenocortical tissues?

*Iuliu Sbiera<sup>1</sup>, Stefan Kircher<sup>2</sup>, Barbara Altieri<sup>1</sup>, Martin Fassnacht<sup>1,3,4</sup>, Matthias Kroiss<sup>1,4,5</sup>, Silviu Sbiera<sup>1</sup>*

<sup>1</sup> Department of Internal Medicine I, Division of Endocrinology and Diabetes, University Hospital Würzburg, 97080 Würzburg, Germany; <sup>2</sup> Institute for Pathology, University of Würzburg, 97080 Würzburg, Germany; <sup>3</sup> Clinical Chemistry and Laboratory Medicine, University Hospital Würzburg, 97080 Würzburg, Germany; <sup>4</sup> Comprehensive Cancer Center Mainfranken, University of Würzburg, 97080 Würzburg, Germany; <sup>5</sup> Department of Internal Medicine IV, University Hospital Munich, Ludwig-Maximilians-Universität München, 80336 Munich, Germany

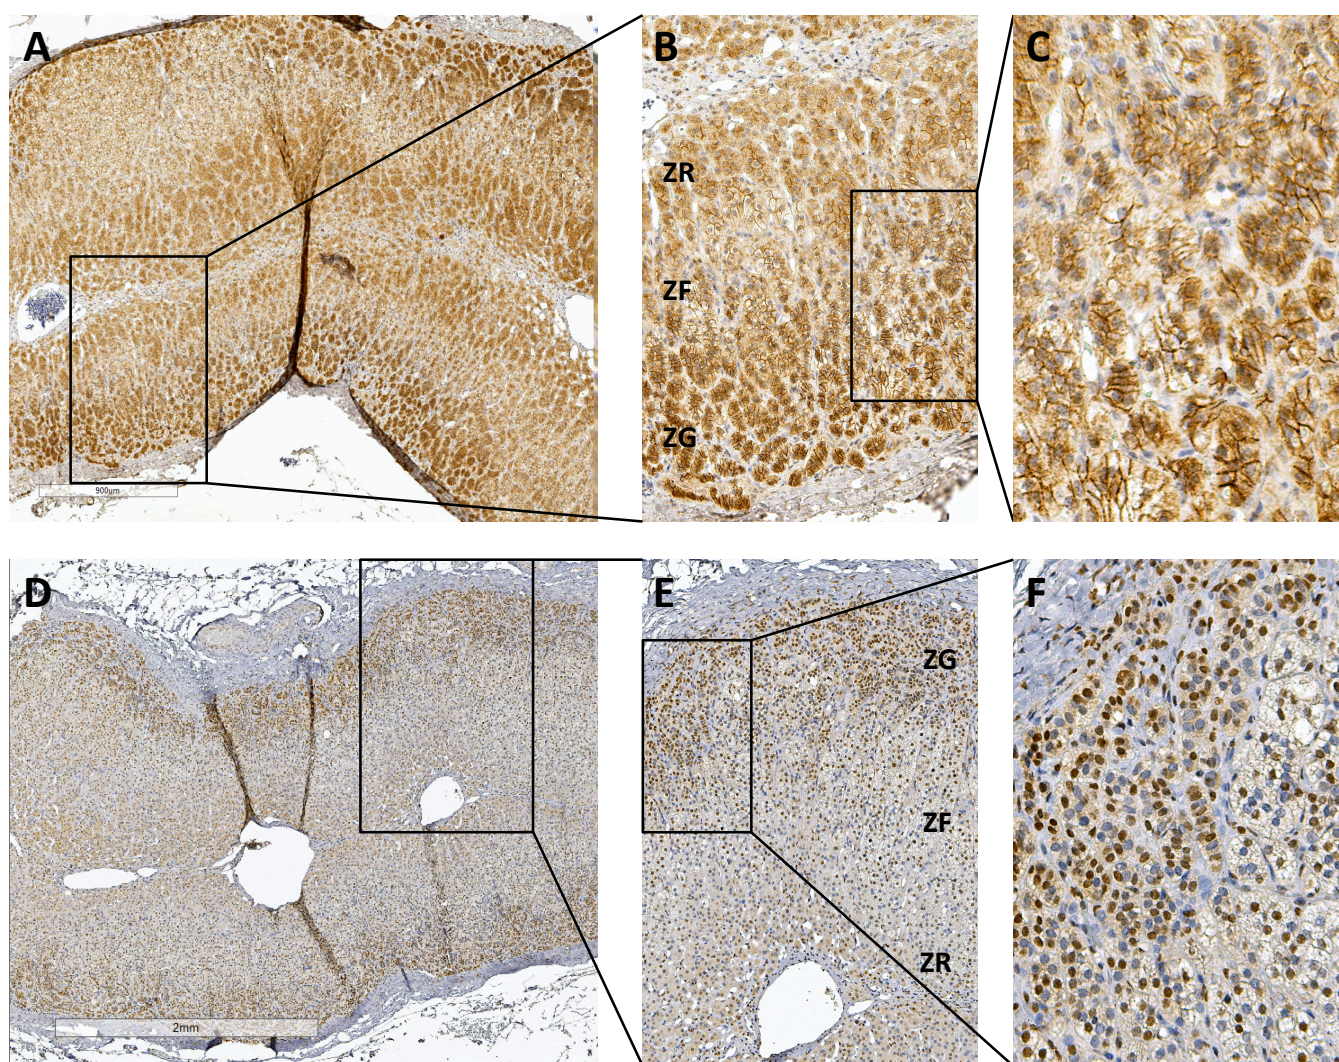

**Supplementary Figure 1. Expression of canonical immunohistochemical mesenchymal markers in normal adrenal gland.** Staining of mesenchymal markers N-cadherin (A, B and C) and SLUG (D, E and F) in normal adrenal gland. Overview of the middle section of a normal adrenal gland (A and D) with zoom in a representative region (B and E) containing all three functional zones of the adrenal gland (ZG= zona glomerulosa, ZF= zona fasciculata and ZR= zona reticularis) and further zoom to visualize staining subcellular localization in C and F, respectively.
